# Supplementary material for: Anti-Inflammatory Effects of Spirodela polyrhiza (L.) SCHLEID. Extract on Contact Dermatitis in Mice—Its Active Compounds and Molecular Targets
Source: MDPI journal article supplement (doi:10.3390/ijms241713271), 2023-08-26
Supplement: s1 [file s1]

## Supplementary data S4

**Table S4.** Hub gene prediction results among 29 CD-related target genes

| Ranking | MCC    |      | EPC    |        | MNC    |    | Degree |    |
|---------|--------|------|--------|--------|--------|----|--------|----|
| 1       | IL6    | 5810 | TNF    | 18.292 | IL6    | 11 | IL6    | 11 |
| 2       | TNF    | 5808 | IL1B   | 18.284 | TNF    | 10 | TNF    | 10 |
| 3       | IL1B   | 5808 | IL4    | 18.272 | IL1B   | 10 | IL1B   | 10 |
| 4       | IL4    | 5784 | IL6    | 18.271 | IL4    | 9  | IL4    | 9  |
| 5       | CCL2   | 5760 | TLR4   | 18.225 | CCL2   | 8  | CCL2   | 8  |
| 6       | IL1A   | 5760 | CCL2   | 18.22  | IL1A   | 8  | IL1A   | 8  |
| 7       | TLR4   | 5065 | IL1A   | 18.204 | TLR4   | 8  | TLR4   | 8  |
| 8       | IFNG   | 5040 | IFNG   | 18.138 | IFNG   | 7  | IFNG   | 7  |
| 9       | VEGFA  | 721  | VEGFA  | 18.105 | CASP8  | 6  | CASP8  | 6  |
| 10      | HMOX1  | 36   | HMOX1  | 17.914 | VEGFA  | 6  | VEGFA  | 6  |
| 11      | CASP8  | 28   | CASP8  | 17.762 | GSR    | 5  | GSR    | 5  |
| 12      | GSR    | 14   | SOD1   | 16.898 | HMOX1  | 4  | HMOX1  | 4  |
| 13      | SOD1   | 13   | GSR    | 16.374 | GCLC   | 4  | GCLC   | 4  |
| 14      | GCLC   | 8    | GCLC   | 15.96  | SOD1   | 4  | SOD1   | 4  |
| 15      | SOD3   | 6    | SOD3   | 15.388 | MAPK1  | 3  | MAPK1  | 3  |
| 16      | MAPK1  | 4    | BCL2   | 15.384 | SOD3   | 3  | SOD3   | 3  |
| 17      | CYP1A1 | 4    | MAPK1  | 15.299 | BCL2   | 2  | BCL2   | 2  |
| 18      | BCL2   | 4    | GSTP1  | 12.889 | GSTP1  | 2  | GSTP1  | 2  |
| 19      | GSTP1  | 3    | CTGF   | 9.801  | AHR    | 1  | AHR    | 1  |
| 20      | AHR    | 1    | S100A8 | 9.627  | UGT1A6 | 1  | UGT1A6 | 1  |
| 21      | UGT1A6 | 1    | CYP1A1 | 8.331  | CTGF   | 1  | CTGF   | 1  |
| 22      | CTGF   | 1    | DDIT3  | 8.298  | S100A8 | 1  | S100A8 | 1  |
| 23      | S100A8 | 1    | UGT1A6 | 4.895  | UGT1A1 | 1  | UGT1A1 | 1  |
| 24      | UGT1A1 | 1    | UGT1A1 | 4.704  | CYP1A1 | 1  | CYP1A1 | 1  |

|    |        |   |        |       |        |   |        |   |
|----|--------|---|--------|-------|--------|---|--------|---|
| 25 | DDIT3  | 1 | AHR    | 4.553 | DDIT3  | 1 | DDIT3  | 1 |
| 26 | MMP10  | 0 | MMP10  | 1     | MMP10  | 0 | MMP10  | 0 |
| 27 | TPSAB1 | 0 | TPSAB1 | 1     | TPSAB1 | 0 | TPSAB1 | 0 |
| 28 | EPHB2  | 0 | EPHB2  | 1     | EPHB2  | 0 | EPHB2  | 0 |
| 29 | OPRM1  | 0 | OPRM1  | 1     | OPRM1  | 0 | OPRM1  | 0 |

The STRING database and the Cytoscape plugin CytoHubba was used for the prediction of hub genes from the PPI analysis. MCC, maximal clique centrality; EPC, edge percolated component; MNC, maximum neighborhood component; Degree, node connect degree.
