# Supplementary material for: Anti-Inflammatory Effects of Spirodela polyrhiza (L.) SCHLEID. Extract on Contact Dermatitis in Mice—Its Active Compounds and Molecular Targets
Source: MDPI journal article supplement (doi:10.3390/ijms241713271), 2023-08-26
Supplement: s1 [file s1]

## Supplementary data S3

**Table S3.** 29 CD-related targets of *S. polyrhiza*

| No. | Gene Name | Gene_ID | UniProt ID | Full_Name                                     | Protein_Class              | EI <sub>gda</sub> |
|-----|-----------|---------|------------|-----------------------------------------------|----------------------------|-------------------|
| 1   | AHR       | 196     | P35869     | aryl hydrocarbon receptor                     | Transcription factor       | 1                 |
| 2   | BCL2      | 596     | P10415     | BCL2 apoptosis regulator                      | Signaling                  | 1                 |
| 3   | CASP8     | 841     | Q14790     | caspase 8                                     | Enzyme                     | 1                 |
| 4   | CCL2      | 6347    | P13500     | C-C motif chemokine ligand 2                  | Signaling                  | 1                 |
| 5   | CCN2      | 1490    | P29279     | cellular communication network factor 2       | Signaling                  | 1                 |
| 6   | CYP1A1    | 1543    | P04798     | cytochrome P450 family 1 subfamily A member 1 | Enzyme                     | 1                 |
| 7   | DDIT3     | 1649    | P35638     | DNA damage inducible transcript 3             |                            | 1                 |
| 8   | EPHB2     | 2048    | P29323     | EPH receptor B2                               | Kinase                     | 1                 |
| 9   | GCLC      | 2729    | P48506     | glutamate-cysteine ligase catalytic subunit   | Enzyme                     | 1                 |
| 10  | GSR       | 2936    | P00390     | glutathione-disulfide reductase               | Enzyme                     | 1                 |
| 11  | GSTP1     | 2950    | P09211     | glutathione S-transferase pi 1                |                            | 1                 |
| 12  | HMOX1     | 3162    | P09601     | heme oxygenase 1                              |                            | 1                 |
| 13  | IFNG      | 3458    | P01579     | interferon gamma                              |                            | 1                 |
| 14  | IL1A      | 3552    | P01583     | interleukin 1 alpha                           |                            | 1                 |
| 15  | IL1B      | 3553    | P01584     | interleukin 1 beta                            |                            | 1                 |
| 16  | IL4       | 3565    | P05112     | interleukin 4                                 |                            | 1                 |
| 17  | IL6       | 3569    | P05231     | interleukin 6                                 |                            | 1                 |
| 18  | MAPK1     | 5594    | P28482     | mitogen-activated protein kinase 1            | Kinase                     | 1                 |
| 19  | MMP10     | 4319    | P09238     | matrix metalloproteinase 10                   | Enzyme                     | 1                 |
| 20  | OPRM1     | 4988    | P35372     | opioid receptor mu 1                          | G-protein coupled receptor | 1                 |
| 21  | S100A8    | 6279    | P05109     | S100 calcium binding protein A8               | Calcium-binding protein    | 1                 |

|    |        |       |               |                                                |           |     |
|----|--------|-------|---------------|------------------------------------------------|-----------|-----|
| 22 | SOD1   | 6647  | P00441        | superoxide dismutase 1                         | Enzyme    | 1   |
| 23 | SOD3   | 6649  | P08294        | superoxide dismutase 3                         | Enzyme    | 1   |
| 24 | TLR4   | 7099  | O00206        | toll like receptor 4                           |           | 1   |
| 25 | TNF    | 7124  | P01375        | tumor necrosis factor                          | Signaling | 0.8 |
| 26 | TPSAB1 | 7177  | P20231;Q15661 | tryptase alpha/beta 1                          | Enzyme    | 1   |
| 27 | UGT1A1 | 54658 | P22309        | UDP glucuronosyltransferase family 1 member A1 |           | 1   |
| 28 | UGT1A6 | 54578 | P19224        | UDP glucuronosyltransferase family 1 member A6 |           | 1   |
| 29 | VEGFA  | 7422  | P15692        | vascular endothelial growth factor A           | Signaling | 1   |

EL, Evidence Index.
