# Supplementary material for: Anti-Inflammatory Effects of Spirodela polyrhiza (L.) SCHLEID. Extract on Contact Dermatitis in Mice—Its Active Compounds and Molecular Targets
Source: MDPI journal article supplement (doi:10.3390/ijms241713271), 2023-08-26
Supplement: s1 [file s1]

## Supplementary data S9

### *CD induction and experimental schedule*

Mice were sensitized with 30  $\mu$ L of DNFB (0.2%, *v/v*) in acetone: olive oil (AOO, 4:1) onto both ears for three consecutive days. After four days of sensitization, the dorsum of all mice were shaved. On day 8, each mouse was challenged with 60  $\mu$ L of DNFB (0.1% *v/v*) in AOO onto the shaved dorsum every two days (four times applications in total).

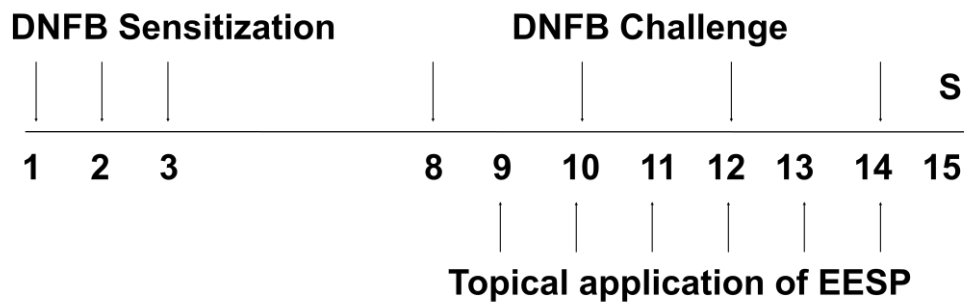

**Figure S5. Experimental schedule.** DNFB was applied onto the surface of each ear for sensitization on days 1, 2 and 3. Challenging was conducted using 0.1% of DNFB on days 8, 10, 12 and 14. EESP and dexamethasone were topically applied for 6 consecutive days. All animals were sacrificed on day 15. EESP, 70% ethanol extract of *S. polyrhiza* whole plant; DNFB, 1-fluoro-2,4-dinitrobenzene; S, sacrifice.
