# Supplementary material for: Anti-Inflammatory Effects of Spirodela polyrhiza (L.) SCHLEID. Extract on Contact Dermatitis in Mice—Its Active Compounds and Molecular Targets
Source: MDPI journal article supplement (doi:10.3390/ijms241713271), 2023-08-26
Supplement: s1 [file s1]

## Supplementary data S6

### *The identification of enriched transcriptomic signatures*

For the identification of enriched transcriptomic signatures, analysis was conducted by using Enrichr website (<https://maayanlab.cloud/Enrichr/>).

### *Target genes had a significant association with the gene set linked to atopic dermatitis*

The enrichment analysis of RNAseq automatic Gene Expression Omnibus (GEO) signatures revealed that active compounds of *S. polyrhiza* (730 target genes) were associated with mouse down gene set including Atopic Dermatitis Nestin-Cre IKK2 (GSE109936).

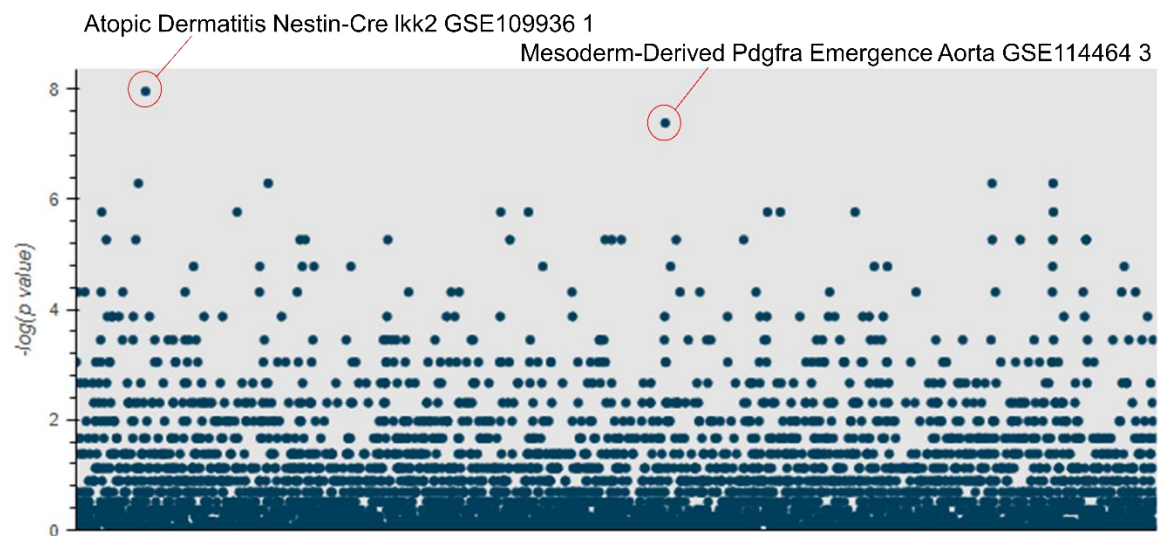

**Figure S2.** Manhattan plot of terms from the RNA-seq\_Automatic\_GEO\_Signatures\_Mouse\_Down gene set. Each point represents a single term along the x-axis. The y-values represent the  $-\log_{10}$  (p-value) corresponding to the enrichment of the input gene set for the term gene set. Hovering over the point will display the gene set term and the enrichment analysis  $p$ -value.
