# Supplementary material for: Anti-Inflammatory Effects of Spirodela polyrhiza (L.) SCHLEID. Extract on Contact Dermatitis in Mice—Its Active Compounds and Molecular Targets
Source: MDPI journal article supplement (doi:10.3390/ijms241713271), 2023-08-26
Supplement: s1 [file s1]

## Supplementary Data S1

**Table S1.** Total compounds of *S. polyrhiza*

| No. | Molecule Name                                           | PubChem<br>CID | Source  |      |       |
|-----|---------------------------------------------------------|----------------|---------|------|-------|
|     |                                                         |                | TCMBank | ETCM | TCMSP |
| 1   | (+)-armepavine                                          | 680292         | ○       |      |       |
| 2   | (10r)-hydroxyhexadeca-7z,11e,13z-trienoicacid           | -              | ○       | ○    |       |
| 3   | (E,7S,11R)-3,7,11,15-tetramethylhexadec-2-en-1-ol       | 6474938        | ○       |      | ○     |
| 4   | (R)-N-methylcoclaurine                                  | 440595         | ○       |      |       |
| 5   | (R,7E,11Z,13Z)-10-hydroxyhexadeca-7,11,13-trienoic acid | -              | ○       | ○    | ○     |
| 6   | 1,3-phytadiene                                          | -              | ○       |      | ○     |
| 7   | 10-nonacosanol                                          | 342803         | ○       |      |       |
| 8   | 11-hexadecenoic acid                                    | 5312414        | ○       |      |       |
| 9   | 1-o-beta-d-glucopytanosylamplexine                      | -              | ○       |      |       |
| 10  | 2-hexadecenoic acid                                     | 5282743        | ○       |      | ○     |
| 11  | 2-hydroxychrysophanol                                   | 442759         | ○       |      |       |
| 12  | 2Z-hexadecenoic acid                                    | 5312417        |         | ○    |       |
| 13  | 3-hexadecenoic acid                                     | 5312418        | ○       |      | ○     |
| 14  | 4(R)-4-hydroxyisophytol                                 | -              | ○       | ○    | ○     |
| 15  | 5-o-caffeoylquinic acid                                 | 5280633        |         |      | ○     |
| 16  | 6-methylcodeine                                         | 5492619        | ○       |      |       |
| 17  | anonaine                                                | 160597         | ○       |      |       |
| 18  | apigenin                                                | 5280443        | ○       |      | ○     |
| 19  | apigetrin                                               | 5280704        | ○       |      | ○     |
| 20  | apiose                                                  | 12306753       | ○       |      |       |
| 21  | asparagine                                              | 6267           |         |      | ○     |
| 22  | beta-carotene                                           | 5280489        | ○       |      | ○     |
| 23  | beta-sitosterol                                         | 222284         |         | ○    | ○     |

|    |                          |           |   |   |   |
|----|--------------------------|-----------|---|---|---|
| 24 | butylated hydroxytoluene | 31404     | ○ |   | ○ |
| 25 | chlorogenic Acid         | 1794427   |   | ○ |   |
| 26 | D-ascorbic acid          | 54690394  | ○ |   | ○ |
| 27 | delta-hydrooxylysine     | 22712964  | ○ | ○ |   |
| 28 | glycerol palmitate       | 14900     |   |   | ○ |
| 29 | higenamine               | 114840    | ○ |   |   |
| 30 | hypolaetin-8-glucoside   | 5318255   | ○ | ○ |   |
| 31 | isoliensinine            | 5274591   | ○ |   |   |
| 32 | isoquercitrin            | 51402807  | ○ |   |   |
| 33 | isoscoparin              | 442611    | ○ | ○ |   |
| 34 | isoscutellarein          | 5281665   | ○ |   |   |
| 35 | isovitexin               | 162350    | ○ |   | ○ |
| 36 | liensinine               | 160644    | ○ |   |   |
| 37 | linoelaidic acid         | 5282457   |   | ○ | ○ |
| 38 | linoleate                | 5460332   |   | ○ |   |
| 39 | linolenic acid           | 5280934   |   | ○ | ○ |
| 40 | lirinidine               | 31069     | ○ |   |   |
| 41 | lutein                   | 5281243   | ○ |   | ○ |
| 42 | lutein 5,6-epoxide       | 5281244   | ○ |   | ○ |
| 43 | luteolin                 | 5280445   | ○ |   | ○ |
| 44 | luteolin-7-O-galactoside | 5488493   |   | ○ | ○ |
| 45 | luteolin-7-o-glucoside   | 5280637   | ○ | ○ | ○ |
| 46 | lycopersene              | 5365816   | ○ | ○ | ○ |
| 47 | methylazoxymethanol      | 6433205   | ○ |   |   |
| 48 | micheline B              | 10144     | ○ |   |   |
| 49 | neferine                 | 134693217 | ○ |   |   |
| 50 | nelumboside              | 11968794  | ○ |   |   |
| 51 | nematocyphol acetate     | 78385349  | ○ |   |   |
| 52 | neoxanthin               | 139033583 | ○ |   | ○ |

|       |                           |           |    |    |    |
|-------|---------------------------|-----------|----|----|----|
| 53    | n-methylasimilobine       | 5319512   | ○  |    |    |
| 54    | norarmepavine             | 6999736   | ○  |    |    |
| 55    | nornuciferine             | 624491    | ○  |    |    |
| 56    | nuciferine                | 10146     | ○  |    |    |
| 57    | nudicauline               | 101631701 | ○  |    |    |
| 58    | orientin                  | 5281675   | ○  |    | ○  |
| 59    | palmitic acid             | 985       |    |    | ○  |
| 60    | phenol                    | 996       | ○  | ○  | ○  |
| 61    | propanethial s-oxide      | 441491    | ○  |    |    |
| 62    | quercetin-3-O-galactoside | 90657624  | ○  |    |    |
| 63    | roemerine                 | 119204    | ○  |    |    |
| 64    | rolliniastatin 1          | 101993683 | ○  |    |    |
| 65    | roughanic acid            | 5312428   | ○  | ○  | ○  |
| 66    | rutin                     | 5280805   | ○  | ○  | ○  |
| 67    | saffloryellow             | 78076204  | ○  |    |    |
| 68    | sitogluside               | 5742590   | ○  |    | ○  |
| 69    | stigmasterol              | 5280794   | ○  | ○  | ○  |
| 70    | tannins                   | 250395    | ○  |    |    |
| 71    | trans-1,3-phytodiene      | 53423857  | ○  |    |    |
| 72    | vitexin                   | 5280441   | ○  |    | ○  |
| 73    | XAT                       | 51346155  | ○  |    | ○  |
| Total |                           |           | 62 | 19 | 34 |

The compound list was obtained from TCM databases (TCMBank (<https://tcmbank.cn/>), ETCM v2.0 (<http://www.tcmip.cn/ETCM2/front/#/>) and TCMSP (<https://tcmsp-e.com/tcmsp.php>)).
