# Supplementary material for: Anti-Inflammatory Effects of Spirodela polyrhiza (L.) SCHLEID. Extract on Contact Dermatitis in Mice—Its Active Compounds and Molecular Targets
Source: Int J Mol Sci. 2023 Aug 26;24(17):13271. doi: 10.3390/ijms241713271 (PMC10488168; doi:10.3390/ijms241713271)
Supplement: Supplementary file 1 [file ijms-24-13271-s001.zip]

Archive with 9 entries (9 files):
- Supplementary S1. Total compounds of S. polyrhiza.pdf
- Supplementary S2. Target gene list of all compounds.xlsx
- Supplementary S3. 29 CD related targets of S. polyrhiza.pdf
- Supplementary S4. Key protein prediction results.pdf
- Supplementary S5. Infiltrated immune cells.pdf
- Supplementary S6. RNA-seq Automatic GEO signatures.pdf
- Supplementary S7. Changes in BW and SB ratio.pdf
- Supplementary S8. Flow of network based analysis (Figure S4).jpg
- Supplementary S9. Experimental schedule.pdf
