# Supplementary material for: Anti-Inflammatory Effects of Spirodela polyrhiza (L.) SCHLEID. Extract on Contact Dermatitis in Mice—Its Active Compounds and Molecular Targets
Source: Int J Mol Sci. 2023 Aug 26;24(17):13271. doi: 10.3390/ijms241713271 (PMC10488168; doi:10.3390/ijms241713271)
Supplement: Supplementary file 1 [file ijms-24-13271-s001.zip › Supplementary S2. Target gene list of all compounds.xlsx]

## Sheet: Target genes of each com
Supplementary data S2
Table. S2. Target gene list of all compounds
No.	Molecule	Target gene
1	(+)-armepavine	KCNH2
2	(+)-armepavine	PIM1
3	(+)-armepavine	ESR1
4	(+)-armepavine	NOS2
5	(+)-armepavine	GSK3B
6	(+)-armepavine	SCN5A
7	(+)-armepavine	CCNA2
8	(+)-armepavine	CHEK1
9	(+)-armepavine	ADRB2
10	(+)-armepavine	ESR2
11	(+)-armepavine	ACHE
12	(+)-armepavine	DPP4
13	(+)-armepavine	PTGS1
14	(+)-armepavine	CDK2
15	(+)-armepavine	PTGS2
16	(+)-armepavine	PPARG
17	(+)-armepavine	MAPK14
18	(+)-armepavine	ADRA1B
19	(+)-armepavine	ADRA1D
20	(+)-armepavine	CHRM2
21	(+)-armepavine	SLC6A4
22	(+)-armepavine	AR
23	(+)-armepavine	CHRM1
24	(+)-armepavine	CHRM3
25	(+)-armepavine	ADRA2C
26	(+)-armepavine	ADRA2B
27	(+)-armepavine	OPRM1
28	(+)-armepavine	RXRA
29	(+)-armepavine	SLC6A2
30	(+)-armepavine	CHRM5
31	(+)-armepavine	PDE3A
32	(+)-armepavine	PRSS1
33	(+)-armepavine	CHRM4
34	(+)-armepavine	SLC6A3
35	(+)-armepavine	DRD3
36	(+)-armepavine	OPRD1
37	(+)-armepavine	ADRB1
38	(10r)-hydroxyhexadeca-7z,11e,13z-trienoicacid	OXER1
39	(10r)-hydroxyhexadeca-7z,11e,13z-trienoicacid	LTB4R
40	(10r)-hydroxyhexadeca-7z,11e,13z-trienoicacid	PPARG
41	(E,7S,11R)-3,7,11,15-tetramethylhexadec-2-en-1-ol	ACHE
42	(E,7S,11R)-3,7,11,15-tetramethylhexadec-2-en-1-ol	PTGS2
43	(R)-N-methylcoclaurine	PIM1
44	(R)-N-methylcoclaurine	ESR1
45	(R)-N-methylcoclaurine	NOS2
46	(R)-N-methylcoclaurine	GSK3B
47	(R)-N-methylcoclaurine	SCN5A
48	(R)-N-methylcoclaurine	CCNA2
49	(R)-N-methylcoclaurine	DRD1
50	(R)-N-methylcoclaurine	CHEK1
51	(R)-N-methylcoclaurine	ADRB2
52	(R)-N-methylcoclaurine	ESR2
53	(R)-N-methylcoclaurine	CALM3
54	(R)-N-methylcoclaurine	DPP4
55	(R)-N-methylcoclaurine	PTGS1
56	(R)-N-methylcoclaurine	CDK2
57	(R)-N-methylcoclaurine	PTGS2
58	(R)-N-methylcoclaurine	PPARG
59	(R)-N-methylcoclaurine	ADRA2A
60	(R)-N-methylcoclaurine	MAPK14
61	(R)-N-methylcoclaurine	ADRA1B
62	(R)-N-methylcoclaurine	ADRA1D
63	(R)-N-methylcoclaurine	CHRM2
64	(R)-N-methylcoclaurine	SLC6A4
65	(R)-N-methylcoclaurine	AR
66	(R)-N-methylcoclaurine	CHRM1
67	(R)-N-methylcoclaurine	CHRM3
68	(R)-N-methylcoclaurine	ADRA2C
69	(R)-N-methylcoclaurine	ADRA2B
70	(R)-N-methylcoclaurine	OPRM1
71	(R)-N-methylcoclaurine	RXRA
72	(R)-N-methylcoclaurine	SLC6A2
73	(R)-N-methylcoclaurine	CHRM5
74	(R)-N-methylcoclaurine	PDE3A
75	(R)-N-methylcoclaurine	PRSS1
76	(R)-N-methylcoclaurine	CHRM4
77	(R)-N-methylcoclaurine	SLC6A3
78	(R)-N-methylcoclaurine	DRD5
79	(R)-N-methylcoclaurine	ADRA1A
80	(R)-N-methylcoclaurine	OPRD1
81	(R)-N-methylcoclaurine	ADRB1
82	(R,7E,11Z,13Z)-10-hydroxyhexadeca-7,11,13-trienoic acid	NOS2
83	(R,7E,11Z,13Z)-10-hydroxyhexadeca-7,11,13-trienoic acid	ACHE
84	(R,7E,11Z,13Z)-10-hydroxyhexadeca-7,11,13-trienoic acid	PTGS2
85	(R,7E,11Z,13Z)-10-hydroxyhexadeca-7,11,13-trienoic acid	PPARG
86	(R,7E,11Z,13Z)-10-hydroxyhexadeca-7,11,13-trienoic acid	CA2
87	(R,7E,11Z,13Z)-10-hydroxyhexadeca-7,11,13-trienoic acid	LTB4R
88	(R,7E,11Z,13Z)-10-hydroxyhexadeca-7,11,13-trienoic acid	OXER1
89	1,3-phytadiene
90	10-nonacosanol
91	11-hexadecenoic acid	NOS2
92	11-hexadecenoic acid	NCOA2
93	11-hexadecenoic acid	ACHE
94	11-hexadecenoic acid	DPP4
95	11-hexadecenoic acid	PTGS1
96	11-hexadecenoic acid	PTGS2
97	11-hexadecenoic acid	PPARG
98	11-hexadecenoic acid	RHO
99	1-o-beta-d-glucopytanosylamplexine
100	2-hexadecenoic acid	FYN
101	2-hexadecenoic acid	MERTK
102	2-hexadecenoic acid	CYP4F2
103	2-hexadecenoic acid	CYP2J2
104	2-hexadecenoic acid	CYP11B2
105	2-hexadecenoic acid	POR
106	2-hexadecenoic acid	NR3C1
107	2-hexadecenoic acid	PIM1
108	2-hexadecenoic acid	NOS2
109	2-hexadecenoic acid	SLC2A4
110	2-hexadecenoic acid	FLT1
111	2-hexadecenoic acid	NOS1
112	2-hexadecenoic acid	GSK3B
113	2-hexadecenoic acid	JAK2
114	2-hexadecenoic acid	SLC2A1
115	2-hexadecenoic acid	LTC4S
116	2-hexadecenoic acid	BTK
117	2-hexadecenoic acid	SYK
118	2-hexadecenoic acid	AXL
119	2-hexadecenoic acid	CSK
120	2-hexadecenoic acid	FZD1
121	2-hexadecenoic acid	CYP2A13
122	2-hexadecenoic acid	CYP2B6
123	2-hexadecenoic acid	CYP2A7
124	2-hexadecenoic acid	CYP2A6
125	2-hexadecenoic acid	NCOA2
126	2-hexadecenoic acid	CYP2C19
127	2-hexadecenoic acid	LYN
128	2-hexadecenoic acid	CYP27A1
129	2-hexadecenoic acid	MET
130	2-hexadecenoic acid	JAK1
131	2-hexadecenoic acid	ABL1
132	2-hexadecenoic acid	ACHE
133	2-hexadecenoic acid	GSK3A
134	2-hexadecenoic acid	DPP4
135	2-hexadecenoic acid	CYP2E1
136	2-hexadecenoic acid	IGF1R
137	2-hexadecenoic acid	SFRP1
138	2-hexadecenoic acid	PTGS1
139	2-hexadecenoic acid	ITK
140	2-hexadecenoic acid	SMO
141	2-hexadecenoic acid	CYP17A1
142	2-hexadecenoic acid	ERN1
143	2-hexadecenoic acid	CYP7B1
144	2-hexadecenoic acid	MAP3K7
145	2-hexadecenoic acid	KDR
146	2-hexadecenoic acid	ROR1
147	2-hexadecenoic acid	GCG
148	2-hexadecenoic acid	CYP3A4
149	2-hexadecenoic acid	MLKL
150	2-hexadecenoic acid	RIPK3
151	2-hexadecenoic acid	STK11
152	2-hexadecenoic acid	FGFR1
153	2-hexadecenoic acid	CYP1A1
154	2-hexadecenoic acid	EPHB1
155	2-hexadecenoic acid	NOS3
156	2-hexadecenoic acid	KIT
157	2-hexadecenoic acid	CYP7A1
158	2-hexadecenoic acid	SREBF1
159	2-hexadecenoic acid	PPARA
160	2-hexadecenoic acid	EPHB2
161	2-hexadecenoic acid	RIPK1
162	2-hexadecenoic acid	SRC
163	2-hexadecenoic acid	PPARG
164	2-hexadecenoic acid	IRAK1
165	2-hexadecenoic acid	IRAK4
166	2-hexadecenoic acid	PDGFRA
167	2-hexadecenoic acid	RET
168	2-hexadecenoic acid	TSSK3
169	2-hexadecenoic acid	SLC22A10
170	2-hexadecenoic acid	EPHA2
171	2-hexadecenoic acid	TSSK2
172	2-hexadecenoic acid	MAP3K9
173	2-hexadecenoic acid	PIM3
174	2-hexadecenoic acid	CYP2W1
175	2-hexadecenoic acid	PKDCC
176	2-hexadecenoic acid	CYP2C8
177	2-hexadecenoic acid	TEK
178	2-hexadecenoic acid	CYP2F1
179	2-hexadecenoic acid	FZD7
180	2-hexadecenoic acid	SLC22A2
181	2-hexadecenoic acid	CYP3A7
182	2-hexadecenoic acid	SFRP4
183	2-hexadecenoic acid	TRIB2
184	2-hexadecenoic acid	SLC2A5
185	2-hexadecenoic acid	TRIB3
186	2-hexadecenoic acid	MFRP
187	2-hexadecenoic acid	YES1
188	2-hexadecenoic acid	LIMK2
189	2-hexadecenoic acid	CYP24A1
190	2-hexadecenoic acid	BMX
191	2-hexadecenoic acid	CYP51A1
192	2-hexadecenoic acid	PDGFRB
193	2-hexadecenoic acid	BLK
194	2-hexadecenoic acid	CORIN
195	2-hexadecenoic acid	PTK7
196	2-hexadecenoic acid	EPHA10
197	2-hexadecenoic acid	MELK
198	2-hexadecenoic acid	EPHA6
199	2-hexadecenoic acid	FGFR2
200	2-hexadecenoic acid	EPHA7
201	2-hexadecenoic acid	MOS
202	2-hexadecenoic acid	FGFRL1
203	2-hexadecenoic acid	CYP20A1
204	2-hexadecenoic acid	SLC2A3
205	2-hexadecenoic acid	CYP26C1
206	2-hexadecenoic acid	SLC2A11
207	2-hexadecenoic acid	FZD3
208	2-hexadecenoic acid	DSTYK
209	2-hexadecenoic acid	AR
210	2-hexadecenoic acid	STK40
211	2-hexadecenoic acid	SLC2A14
212	2-hexadecenoic acid	SLC17A3
213	2-hexadecenoic acid	FZD4
214	2-hexadecenoic acid	PIM2
215	2-hexadecenoic acid	HUNK
216	2-hexadecenoic acid	SLC22A1
217	2-hexadecenoic acid	FLT4
218	2-hexadecenoic acid	EPHA1
219	2-hexadecenoic acid	CYP4F12
220	2-hexadecenoic acid	EPHB6
221	2-hexadecenoic acid	CYP8B1
222	2-hexadecenoic acid	SLC2A2
223	2-hexadecenoic acid	RIPK2
224	2-hexadecenoic acid	SLC2A9
225	2-hexadecenoic acid	FRZB
226	2-hexadecenoic acid	CYP4A11
227	2-hexadecenoic acid	SLC16A10
228	2-hexadecenoic acid	TSSK1B
229	2-hexadecenoic acid	CYP4V2
230	2-hexadecenoic acid	PDGFRL
231	2-hexadecenoic acid	SRMS
232	2-hexadecenoic acid	SFRP5
233	2-hexadecenoic acid	CYP2C18
234	2-hexadecenoic acid	SV2B
235	2-hexadecenoic acid	CYP27B1
236	2-hexadecenoic acid	TYW1
237	2-hexadecenoic acid	FFAR4
238	2-hexadecenoic acid	CYP26B1
239	2-hexadecenoic acid	RIPK4
240	2-hexadecenoic acid	CYP2U1
241	2-hexadecenoic acid	FGFR3
242	2-hexadecenoic acid	EPHA4
243	2-hexadecenoic acid	SLC2A7
244	2-hexadecenoic acid	C1QTNF5
245	2-hexadecenoic acid	TEC
246	2-hexadecenoic acid	INSR
247	2-hexadecenoic acid	IRAK2
248	2-hexadecenoic acid	CYP46A1
249	2-hexadecenoic acid	MATK
250	2-hexadecenoic acid	EPHA5
251	2-hexadecenoic acid	FLT3
252	2-hexadecenoic acid	INSRR
253	2-hexadecenoic acid	CYP4Z1
254	2-hexadecenoic acid	SLC22A11
255	2-hexadecenoic acid	CYP2R1
256	2-hexadecenoic acid	FZD5
257	2-hexadecenoic acid	PBK
258	2-hexadecenoic acid	MAP3K21
259	2-hexadecenoic acid	ERN2
260	2-hexadecenoic acid	FGFR4
261	2-hexadecenoic acid	EPHA8
262	2-hexadecenoic acid	CYP4A22
263	2-hexadecenoic acid	JAK3
264	2-hexadecenoic acid	STYK1
265	2-hexadecenoic acid	FZD6
266	2-hexadecenoic acid	SLC16A11
267	2-hexadecenoic acid	FGR
268	2-hexadecenoic acid	EPHB4
269	2-hexadecenoic acid	SLC6A2
270	2-hexadecenoic acid	CYP27C1
271	2-hexadecenoic acid	FZD2
272	2-hexadecenoic acid	TYK2
273	2-hexadecenoic acid	TESK1
274	2-hexadecenoic acid	MTRR
275	2-hexadecenoic acid	CYP2S1
276	2-hexadecenoic acid	SPNS2
277	2-hexadecenoic acid	SLC22A24
278	2-hexadecenoic acid	SLC22A9
279	2-hexadecenoic acid	FZD8
280	2-hexadecenoic acid	CYP2D6
281	2-hexadecenoic acid	CSF1R
282	2-hexadecenoic acid	MUSK
283	2-hexadecenoic acid	SLC16A6
284	2-hexadecenoic acid	SFRP2
285	2-hexadecenoic acid	CYP4B1
286	2-hexadecenoic acid	OLAH
287	2-hexadecenoic acid	TBXAS1
288	2-hexadecenoic acid	LCK
289	2-hexadecenoic acid	CYP2C9
290	2-hexadecenoic acid	SLC16A12
291	2-hexadecenoic acid	MFSD1
292	2-hexadecenoic acid	ABL2
293	2-hexadecenoic acid	IRAK3
294	2-hexadecenoic acid	CYP4F22
295	2-hexadecenoic acid	NDOR1
296	2-hexadecenoic acid	IGHG1
297	2-hexadecenoic acid	NIM1K
298	2-hexadecenoic acid	MAP3K11
299	2-hexadecenoic acid	MFSD3
300	2-hexadecenoic acid	HCK
301	2-hexadecenoic acid	LIMK1
302	2-hexadecenoic acid	CYP4X1
303	2-hexadecenoic acid	TIE1
304	2-hexadecenoic acid	SLC16A9
305	2-hexadecenoic acid	RHO
306	2-hexadecenoic acid	PTGIS
307	2-hexadecenoic acid	ZAP70
308	2-hexadecenoic acid	TXK
309	2-hexadecenoic acid	CYP3A43
310	2-hexadecenoic acid	EPHA3
311	2-hexadecenoic acid	MAP3K20
312	2-hexadecenoic acid	SPNS3
313	2-hexadecenoic acid	FZD10
314	2-hexadecenoic acid	SPNS1
315	2-hexadecenoic acid	EPHB3
316	2-hexadecenoic acid	SLC22A8
317	2-hexadecenoic acid	PASK
318	2-hexadecenoic acid	SLC16A5
319	2-hexadecenoic acid	CYP39A1
320	2-hexadecenoic acid	SLC33A1
321	2-hexadecenoic acid	SLC22A12
322	2-hexadecenoic acid	CYP4F3
323	2-hexadecenoic acid	SLC22A7
324	2-hexadecenoic acid	TRIB1
325	2-hexadecenoic acid	SLC16A8
326	2-hexadecenoic acid	CDC42BPB
327	2-hexadecenoic acid	MAP3K10
328	2-hexadecenoic acid	SLC22A6
329	2-hexadecenoic acid	TSSK4
330	2-hexadecenoic acid	CYP26A1
331	2-hexadecenoic acid	PTK6
332	2-hexadecenoic acid	CYP11B1
333	2-hexadecenoic acid	TYRO3
334	2-hexadecenoic acid	CYP4F11
335	2-hexadecenoic acid	SLC16A1
336	2-hexadecenoic acid	CYP11A1
337	2-hexadecenoic acid	FZD9
338	2-hexadecenoic acid	CYP3A5
339	2-hexadecenoic acid	CYP1A2
340	2-hexadecenoic acid	TESK2
341	2-hexadecenoic acid	SLC22A25
342	2-hydroxychrysophanol
343	2Z-hexadecenoic acid	CDC25A
344	2Z-hexadecenoic acid	EP300
345	2Z-hexadecenoic acid	CDC25B
346	3-Hexadecenoic acid
347	4(R)-4-hydroxyisophytol	TRPC6
348	5-o-caffeoylquinic acid	GAA
349	6-methylcodeine
350	anonaine	PIM1
351	anonaine	ESR1
352	anonaine	NOS2
353	anonaine	SCN5A
354	anonaine	CCNA2
355	anonaine	CHEK1
356	anonaine	ADRB2
357	anonaine	ESR2
358	anonaine	ACHE
359	anonaine	DPP4
360	anonaine	PTGS1
361	anonaine	CDK2
362	anonaine	CHRNA7
363	anonaine	PTGS2
364	anonaine	SLC6A12
365	anonaine	MAPK14
366	anonaine	SLC6A19
367	anonaine	ADRA1B
368	anonaine	ADRA1D
369	anonaine	SLC6A8
370	anonaine	TH
371	anonaine	SLC6A4
372	anonaine	AR
373	anonaine	CHRM1
374	anonaine	SLC6A1
375	anonaine	CHRM3
376	anonaine	SLC6A11
377	anonaine	SLC6A5
378	anonaine	SLC6A13
379	anonaine	SLC6A7
380	anonaine	OPRM1
381	anonaine	RXRA
382	anonaine	SLC6A15
383	anonaine	SLC6A2
384	anonaine	HTR3A
385	anonaine	CHRM5
386	anonaine	DDC
387	anonaine	SLC6A16
388	anonaine	SLC6A17
389	anonaine	SLC6A3
390	anonaine	SLC6A18
391	anonaine	SLC6A9
392	anonaine	OPRD1
393	anonaine	SLC6A20
394	apigenin	TAGLN
395	apigenin	G6PC
396	apigenin	AKT1
397	apigenin	TNF
398	apigenin	GAD1
399	apigenin	CXCL12
400	apigenin	TOP2A
401	apigenin	CXCR4
402	apigenin	PLAU
403	apigenin	PIM1
404	apigenin	FAS
405	apigenin	ICAM1
406	apigenin	ESR1
407	apigenin	NOS2
408	apigenin	UTRN
409	apigenin	FOXO1
410	apigenin	SLC2A4
411	apigenin	INS
412	apigenin	ABCB1
413	apigenin	GSK3B
414	apigenin	CDKN1A
415	apigenin	SLC2A1
416	apigenin	SCN5A
417	apigenin	JUN
418	apigenin	IL4
419	apigenin	NOX4
420	apigenin	PTPN11
421	apigenin	HMOX1
422	apigenin	CCNA2
423	apigenin	CDK6
424	apigenin	TOP1
425	apigenin	AXL
426	apigenin	CYP19A1
427	apigenin	CFTR
428	apigenin	POMC
429	apigenin	NCOA2
430	apigenin	CHEK1
431	apigenin	ABCC1
432	apigenin	CDKN2A
433	apigenin	ESR2
434	apigenin	GCLC
435	apigenin	ACHE
436	apigenin	CALM3
437	apigenin	POU5F1
438	apigenin	SOCS3
439	apigenin	DPP4
440	apigenin	CFLAR
441	apigenin	RB1
442	apigenin	AHSA1
443	apigenin	IGF1R
444	apigenin	ABCG2
445	apigenin	SERPINE1
446	apigenin	PTGS1
447	apigenin	CCNB1
448	apigenin	CDK1
449	apigenin	IKBKB
450	apigenin	CDK2
451	apigenin	CYCS
452	apigenin	EGF
453	apigenin	ACACA
454	apigenin	NR1I2
455	apigenin	CYP3A4
456	apigenin	TNFRSF10B
457	apigenin	IL13
458	apigenin	RPS6KB1
459	apigenin	CCND1
460	apigenin	PTGS2
461	apigenin	CYP1A1
462	apigenin	PARP1
463	apigenin	HIF1A
464	apigenin	NFKBIA
465	apigenin	MDM2
466	apigenin	MMP9
467	apigenin	BAD
468	apigenin	CASP9
469	apigenin	BAX
470	apigenin	PTK2
471	apigenin	VEGFA
472	apigenin	CASP7
473	apigenin	CASP3
474	apigenin	IL2
475	apigenin	IFNG
476	apigenin	XIAP
477	apigenin	BCL2
478	apigenin	BCL2L1
479	apigenin	CDK4
480	apigenin	SRC
481	apigenin	MCL1
482	apigenin	CAT
483	apigenin	TP53
484	apigenin	RELA
485	apigenin	PPARG
486	apigenin	FOS
487	apigenin	MAPK3
488	apigenin	MAPK14
489	apigenin	MAPK1
490	apigenin	TOP3B
491	apigenin	TOP2B
492	apigenin	MMP1
493	apigenin	ALG5
494	apigenin	MAOB
495	apigenin	CCN5
496	apigenin	RUNX1T1
497	apigenin	ACAA2
498	apigenin	MS4A2
499	apigenin	SLC5A5
500	apigenin	TRPM2
501	apigenin	FBP1
502	apigenin	POLD1
503	apigenin	EIF6
504	apigenin	MANBA
505	apigenin	F7
506	apigenin	CCND2
507	apigenin	AR
508	apigenin	PSMD3
509	apigenin	IKBKG
510	apigenin	FCER2
511	apigenin	CA2
512	apigenin	UGT1A1
513	apigenin	UGT1A6
514	apigenin	GYPA
515	apigenin	TOP1MT
516	apigenin	INSR
517	apigenin	SPAM1
518	apigenin	FLT3
519	apigenin	AKR1C3
520	apigenin	PSCA
521	apigenin	MAOA
522	apigenin	CDKN2C
523	apigenin	APC
524	apigenin	ODC1
525	apigenin	FXYD2
526	apigenin	TP73
527	apigenin	CD40LG
528	apigenin	LTA
529	apigenin	EEF1E1
530	apigenin	TP53I3
531	apigenin	HERC5
532	apigenin	KARS1
533	apigenin	GUSB
534	apigenin	PRSS1
535	apigenin	PSME3
536	apigenin	HSD17B1
537	apigenin	B3GALT5
538	apigenin	TP63
539	apigenin	VDR
540	apigenin	TNKS2
541	apigenin	ALPL
542	apigenin	AAGAB
543	apigenin	GMNN
544	apigenin	CSNK2A1
545	apigenin	TOP3A
546	apigenin	ELAVL1
547	apigenin	CYP11B1
548	apigenin	XDH
549	apigenin	CD38
550	apigenin	DPEP1
551	apigenin	CYP1A2
552	apigetrin	PTGS2
553	apigetrin	CALM1
554	apiose
555	asparagine	ABAT
556	asparagine	GOT1
557	asparagine	PTPN1
558	asparagine	GABRA1
559	asparagine	CTSD
560	asparagine	BCHE
561	asparagine	PRKACA
562	asparagine	ADH1B
563	asparagine	ADH1C
564	asparagine	AAT
565	asparagine	GOT2
566	asparagine	GATM
567	asparagine	TPI
568	asparagine	ME2
569	beta-carotene	GJA1
570	beta-carotene	AKT1
571	beta-carotene	CAV1
572	beta-carotene	CASP8
573	beta-carotene	MMP10
574	beta-carotene	JUN
575	beta-carotene	HMOX1
576	beta-carotene	MYC
577	beta-carotene	CYP3A4
578	beta-carotene	MMP2
579	beta-carotene	PTGS2
580	beta-carotene	CTNNB1
581	beta-carotene	CASP9
582	beta-carotene	VEGFA
583	beta-carotene	CASP7
584	beta-carotene	CASP3
585	beta-carotene	BCL2
586	beta-carotene	MMP1
587	beta-carotene	ALB
588	beta-carotene	F3
589	beta-carotene	CYP1A2
590	beta-sitosterol	PGR
591	beta-sitosterol	NCOA2
592	beta-sitosterol	PTGS1
593	beta-sitosterol	PTGS2
594	beta-sitosterol	PIK3CG
595	beta-sitosterol	KCNC2
596	beta-sitosterol	PRKACA
597	beta-sitosterol	DRD1
598	beta-sitosterol	CHRM3
599	beta-sitosterol	CHRM1
600	beta-sitosterol	SCN5A
601	beta-sitosterol	GABRA2
602	beta-sitosterol	CHRM4
603	beta-sitosterol	PDE3A
604	beta-sitosterol	HTR2A
605	beta-sitosterol	GABRA5
606	beta-sitosterol	ADRA1A
607	beta-sitosterol	GABRA3
608	beta-sitosterol	CHRM2
609	beta-sitosterol	ADRA1B
610	beta-sitosterol	ADRB2
611	beta-sitosterol	CHRNA2
612	beta-sitosterol	SLC6A4
613	beta-sitosterol	OPRM1
614	beta-sitosterol	GABRA1
615	beta-sitosterol	CHRNA7
616	beta-sitosterol	BCL2
617	beta-sitosterol	BAX
618	beta-sitosterol	CASP9
619	beta-sitosterol	CASP8
620	beta-sitosterol	CASP3
621	beta-sitosterol	PRKCA
622	beta-sitosterol	TGFB1
623	beta-sitosterol	PON2
624	beta-sitosterol	MAP2
625	beta-sitosterol	NR3C2
626	beta-sitosterol	GRIN1
627	beta-sitosterol	CYP19A1
628	beta-sitosterol	BCHE
629	beta-sitosterol	SHBG
630	beta-sitosterol	NR1H3
631	beta-sitosterol	ITGB3
632	beta-sitosterol	GPBAR1
633	beta-sitosterol	AR
634	beta-sitosterol	TRPV1
635	beta-sitosterol	NPC1L1
636	beta-sitosterol	GRIN1
637	beta-sitosterol	F10
638	beta-sitosterol	CYP17A1
639	beta-sitosterol	SREBF2
640	butylated hydroxytoluene	TNF
641	butylated hydroxytoluene	SCN5A
642	butylated hydroxytoluene	JUN
643	butylated hydroxytoluene	HMOX1
644	butylated hydroxytoluene	CYP2B6
645	butylated hydroxytoluene	BMP4
646	butylated hydroxytoluene	PECAM1
647	butylated hydroxytoluene	ADRB2
648	butylated hydroxytoluene	ACHE
649	butylated hydroxytoluene	KDR
650	butylated hydroxytoluene	CYP3A4
651	butylated hydroxytoluene	ABCA1
652	butylated hydroxytoluene	CASP3
653	butylated hydroxytoluene	PCDH12
654	butylated hydroxytoluene	ADRA1B
655	butylated hydroxytoluene	ADRA1D
656	butylated hydroxytoluene	CHRM2
657	butylated hydroxytoluene	SLC6A4
658	butylated hydroxytoluene	CHRM1
659	butylated hydroxytoluene	CA2
660	butylated hydroxytoluene	CHRM3
661	butylated hydroxytoluene	GRIN3A
662	butylated hydroxytoluene	RXRA
663	butylated hydroxytoluene	SFTPB
664	butylated hydroxytoluene	SLC6A2
665	butylated hydroxytoluene	SLC6A3
666	butylated hydroxytoluene	ADRA1A
667	butylated hydroxytoluene	ADRB1
668	chlorogenic acid	PSIP1
669	chlorogenic acid	HSP90AB1
670	chlorogenic acid	MMP13
671	chlorogenic acid	HDAC1
672	chlorogenic acid	MMP12
673	chlorogenic acid	APP
674	D-ascorbic acid	IL1B
675	D-ascorbic acid	TNF
676	D-ascorbic acid	ICAM1
677	D-ascorbic acid	NOS2
678	D-ascorbic acid	GRIA2
679	D-ascorbic acid	TFAM
680	D-ascorbic acid	CCL2
681	D-ascorbic acid	SOD1
682	D-ascorbic acid	JUN
683	D-ascorbic acid	PGD
684	D-ascorbic acid	ACHE
685	D-ascorbic acid	VCAM1
686	D-ascorbic acid	RENBP
687	D-ascorbic acid	DPP4
688	D-ascorbic acid	CYP2E1
689	D-ascorbic acid	AHSA1
690	D-ascorbic acid	PTGS1
691	D-ascorbic acid	CDK2
692	D-ascorbic acid	PTGS2
693	D-ascorbic acid	ATM
694	D-ascorbic acid	CYP1A1
695	D-ascorbic acid	OGG1
696	D-ascorbic acid	IL6
697	D-ascorbic acid	VEGFA
698	D-ascorbic acid	CASP3
699	D-ascorbic acid	CAT
700	D-ascorbic acid	RELA
701	D-ascorbic acid	IL1A
702	D-ascorbic acid	DDIT3
703	D-ascorbic acid	TH
704	D-ascorbic acid	GUCY2F
705	D-ascorbic acid	GPT2
706	D-ascorbic acid	RETN
707	D-ascorbic acid	CA2
708	D-ascorbic acid	MS4A1
709	D-ascorbic acid	COL7A1
710	D-ascorbic acid	GPT
711	D-ascorbic acid	CD40LG
712	D-ascorbic acid	MME
713	D-ascorbic acid	PRSS1
714	D-ascorbic acid	PPARGC1B
715	D-ascorbic acid	NRF1
716	D-ascorbic acid	COL4A2
717	D-ascorbic acid	TNC
718	D-ascorbic acid	LCT
719	D-ascorbic acid	SOD3
720	D-ascorbic acid	GABRA1
721	D-ascorbic acid	CUTA
722	D-ascorbic acid	CYP1A2
723	delta-hydrooxylysine	SLC1A1
724	delta-hydrooxylysine	GRM6
725	delta-hydrooxylysine	LTA4H
726	delta-hydrooxylysine	GRM5
727	delta-hydrooxylysine	GRM8
728	delta-hydrooxylysine	GRM3
729	glycerol palmitate
730	higenamine	PIK3R1
731	higenamine	AKT1
732	higenamine	POR
733	higenamine	NOS2
734	higenamine	NOS1
735	higenamine	PIK3CD
736	higenamine	PIK3CG
737	higenamine	PIK3CB
738	higenamine	PIK3CA
739	higenamine	HMOX1
740	higenamine	ADRB2
741	higenamine	NOS3
742	higenamine	CASP9
743	higenamine	CASP3
744	higenamine	TYW1
745	higenamine	MTRR
746	higenamine	NDOR1
747	higenamine	ADRB3
748	higenamine	ADRB1
749	hypolaetin-8-glucoside	ACHE
750	hypolaetin-8-glucoside	XDH
751	hypolaetin-8-glucoside	PTPN1
752	hypolaetin-8-glucoside	MAPK10
753	hypolaetin-8-glucoside	CA4
754	hypolaetin-8-glucoside	CA1
755	hypolaetin-8-glucoside	TNF
756	hypolaetin-8-glucoside	PLAU
757	hypolaetin-8-glucoside	KDM1A
758	hypolaetin-8-glucoside	CA2
759	hypolaetin-8-glucoside	AURKB
760	hypolaetin-8-glucoside	SENP1
761	hypolaetin-8-glucoside	MMP9
762	hypolaetin-8-glucoside	CA7
763	hypolaetin-8-glucoside	CA12
764	isoliensinine	SOD1
765	isoquercitrin	CA2
766	isoscoparin	PIM1
767	isoscoparin	CA2
768	isoscoparin	PRSS1
769	isoscoparin	GAA
770	isoscoparin	PSIP1
771	isoscoparin	NTSR1
772	isoscutellarein
773	isovitexin	FOXM1
774	isovitexin	E2F1
775	isovitexin	SOD2
776	liensinine
777	linoelaidic acid	PTGS1
778	linoelaidic acid	PTGS2
779	linoelaidic acid	RXRA
780	linoelaidic acid	SLC6A2
781	linoelaidic acid	NCOA2
782	linoelaidic acid	CHRM1
783	linoelaidic acid	ADRB1
784	linoelaidic acid	ADRA2A
785	linoelaidic acid	CHRM2
786	linoelaidic acid	ADRA2B
787	linoelaidic acid	SLC6A3
788	linoelaidic acid	ADRB2
789	linoelaidic acid	SLC6A4
790	linoelaidic acid	MAOB
791	linoelaidic acid	PTPN1
792	linoelaidic acid	PPARG
793	linoelaidic acid	FFAR4
794	linoelaidic acid	FABP1
795	linoelaidic acid	PTPN6
796	linoelaidic acid	OXER1
797	linoelaidic acid	FABP3
798	linoelaidic acid	ALOX5
799	linoelaidic acid	PTPN2
800	linoelaidic acid	OXER1
801	linoleate	PTPN7
802	linoleate	PTPN1
803	linoleate	PPARG
804	linoleate	FFAR4
805	linoleate	FABP1
806	linoleate	PTPN6
807	linoleate	PTGS2
808	linoleate	OXER1
809	linoleate	ALOX5
810	linoleate	RXRA
811	linoleate	PTPN2
812	linoleate	FABP3
813	linolenic acid	PTGS1
814	linolenic acid	PTGS2
815	linolenic acid	RXRA
816	linolenic acid	NCOA2
817	linolenic acid	RXRG
818	linolenic acid	TRPV1
819	linolenic acid	RELA
820	linolenic acid	PCNA
821	linolenic acid	ALB
822	linolenic acid	MYC
823	linolenic acid	CALM1
824	linolenic acid	HNF4A
825	linolenic acid	UCP2
826	linolenic acid	HNF1A
827	linolenic acid	ACTB
828	linolenic acid	TRIM26
829	linolenic acid	PTPN6
830	linolenic acid	OXER1
831	linolenic acid	ALOX5
832	linolenic acid	PTPN2
833	linolenic acid	PPARG
834	linolenic acid	FABP3
835	linolenic acid	PTPN7
836	linolenic acid	PTPN1
837	linolenic acid	FFAR4
838	linolenic acid	FABP1
839	lirinidine
840	lutein	PIM1
841	lutein	NOS2
842	lutein	ELN
843	lutein	ALPL
844	lutein	GFAP
845	lutein	CCND1
846	lutein	PTGS2
847	lutein	AHR
848	lutein	BAX
849	lutein	PPARA
850	lutein	BCL2
851	lutein	TP53
852	lutein	STAT3
853	lutein	RELA
854	lutein	MMP1
855	lutein	BCO1
856	lutein	RARA
857	lutein 5,6-epoxide
858	luteolin	AKT1
859	luteolin	TNF
860	luteolin	TOP2A
861	luteolin	PIM1
862	luteolin	ICAM1
863	luteolin	ESR1
864	luteolin	NOS2
865	luteolin	IL10
866	luteolin	SLC2A4
867	luteolin	GSK3B
868	luteolin	CDKN1A
869	luteolin	JUN
870	luteolin	IL4
871	luteolin	HMOX1
872	luteolin	CCNA2
873	luteolin	TOP1
874	luteolin	NCOA2
875	luteolin	MET
876	luteolin	ESR2
877	luteolin	DPP4
878	luteolin	RB1
879	luteolin	APP
880	luteolin	PTGES
881	luteolin	PTGS1
882	luteolin	CCNB1
883	luteolin	PCNA
884	luteolin	CDK2
885	luteolin	ERBB2
886	luteolin	EGFR
887	luteolin	BIRC5
888	luteolin	MMP2
889	luteolin	CCND1
890	luteolin	PTGS2
891	luteolin	NFKBIA
892	luteolin	MDM2
893	luteolin	IL6
894	luteolin	MMP9
895	luteolin	CASP9
896	luteolin	VEGFA
897	luteolin	CASP7
898	luteolin	CASP3
899	luteolin	IL2
900	luteolin	IFNG
901	luteolin	XIAP
902	luteolin	BCL2L1
903	luteolin	CDK4
904	luteolin	MCL1
905	luteolin	TP53
906	luteolin	RELA
907	luteolin	PPARG
908	luteolin	MAPK3
909	luteolin	MAPK14
910	luteolin	MAPK1
911	luteolin	MMP1
912	luteolin	AR
913	luteolin	NUF2
914	luteolin	CA2
915	luteolin	GSTP1
916	luteolin	INSR
917	luteolin	CD40LG
918	luteolin	PRSS1
919	luteolin	ADCY2
920	luteolin	TYR
921	luteolin	XDH
922	luteolin-7-O-galactoside	F10
923	luteolin-7-O-galactoside	KDM1A
924	luteolin-7-O-galactoside	SENP1
925	luteolin-7-O-galactoside	AURKB
926	luteolin-7-O-galactoside	XDH
927	luteolin-7-O-galactoside	PTPN1
928	luteolin-7-O-galactoside	TNF
929	luteolin-7-O-galactoside	PTGS2
930	luteolin-7-O-galactoside	NOS2
931	luteolin-7-O-glucoside	PTPN1
932	luteolin-7-O-glucoside	TNF
933	luteolin-7-O-glucoside	KDM1A
934	luteolin-7-O-glucoside	POR
935	luteolin-7-O-glucoside	PIM1
936	luteolin-7-O-glucoside	NOS2
937	luteolin-7-O-glucoside	NOS1
938	luteolin-7-O-glucoside	HMOX1
939	luteolin-7-O-glucoside	PTGS2
940	luteolin-7-O-glucoside	NOS3
941	luteolin-7-O-glucoside	SLC5A2
942	luteolin-7-O-glucoside	CA2
943	luteolin-7-O-glucoside	TYW1
944	luteolin-7-O-glucoside	MTRR
945	luteolin-7-O-glucoside	PRSS1
946	luteolin-7-O-glucoside	NDOR1
947	luteolin-7-O-glucoside	SENP1
948	luteolin-7-O-glucoside	AURKB
949	luteolin-7-O-glucoside	XDH
950	lycopersene	CNR2
951	methylazoxymethanol
952	micheline B	PIM1
953	micheline B	ESR1
954	micheline B	NOS2
955	micheline B	GSK3B
956	micheline B	SCN5A
957	micheline B	CCNA2
958	micheline B	CHEK1
959	micheline B	ESR2
960	micheline B	DPP4
961	micheline B	PTGS1
962	micheline B	CDK2
963	micheline B	PTGS2
964	micheline B	TP53
965	micheline B	MAPK14
966	micheline B	AR
967	micheline B	CHRM3
968	micheline B	RXRA
969	neferine	RPS6KB1
970	neferine	MTOR
971	neferine	NFE2L2
972	nelumboside
973	nematocyphol acetate
974	neoxanthin
975	n-methylasimilobine	PIM1
976	n-methylasimilobine	ESR1
977	n-methylasimilobine	SCN5A
978	n-methylasimilobine	CCNA2
979	n-methylasimilobine	DRD1
980	n-methylasimilobine	CHEK1
981	n-methylasimilobine	ADRB2
982	n-methylasimilobine	ESR2
983	n-methylasimilobine	ACHE
984	n-methylasimilobine	DPP4
985	n-methylasimilobine	PTGS1
986	n-methylasimilobine	CDK2
987	n-methylasimilobine	CHRNA7
988	n-methylasimilobine	PTGS2
989	n-methylasimilobine	ADRA1B
990	n-methylasimilobine	ADRA1D
991	n-methylasimilobine	SLC6A4
992	n-methylasimilobine	AR
993	n-methylasimilobine	CHRM1
994	n-methylasimilobine	CHRM3
995	n-methylasimilobine	OPRM1
996	n-methylasimilobine	RXRA
997	n-methylasimilobine	HTR3A
998	n-methylasimilobine	CHRM5
999	n-methylasimilobine	CHRM4
1000	n-methylasimilobine	SLC6A3
1001	n-methylasimilobine	GABRA1
1002	n-methylasimilobine	ADRA1A
1003	n-methylasimilobine	OPRD1
1004	norarmepavine
1005	nornuciferine	PIM1
1006	nornuciferine	ESR1
1007	nornuciferine	NOS2
1008	nornuciferine	GSK3B
1009	nornuciferine	SCN5A
1010	nornuciferine	CCNA2
1011	nornuciferine	CHEK1
1012	nornuciferine	ADRB2
1013	nornuciferine	ESR2
1014	nornuciferine	ACHE
1015	nornuciferine	DPP4
1016	nornuciferine	PTGS1
1017	nornuciferine	CDK2
1018	nornuciferine	CHRNA7
1019	nornuciferine	PTGS2
1020	nornuciferine	MAPK14
1021	nornuciferine	ADRA1B
1022	nornuciferine	ADRA1D
1023	nornuciferine	SLC6A4
1024	nornuciferine	AR
1025	nornuciferine	CHRM1
1026	nornuciferine	CHRM3
1027	nornuciferine	OPRM1
1028	nornuciferine	RXRA
1029	nornuciferine	HTR3A
1030	nornuciferine	CHRM5
1031	nornuciferine	PTPRCAP
1032	nornuciferine	PDE3A
1033	nornuciferine	CHRM4
1034	nornuciferine	SLC6A3
1035	nornuciferine	GABRA1
1036	nornuciferine	ADRA1A
1037	nornuciferine	OPRD1
1038	nuciferine	PIM1
1039	nuciferine	ESR1
1040	nuciferine	SCN5A
1041	nuciferine	CCNA2
1042	nuciferine	DRD1
1043	nuciferine	CHEK1
1044	nuciferine	ADRB2
1045	nuciferine	ESR2
1046	nuciferine	ACHE
1047	nuciferine	DPP4
1048	nuciferine	PTGS1
1049	nuciferine	CDK2
1050	nuciferine	CHRNA7
1051	nuciferine	PTGS2
1052	nuciferine	ADRA1B
1053	nuciferine	ADRA1D
1054	nuciferine	SLC6A4
1055	nuciferine	AR
1056	nuciferine	CHRM1
1057	nuciferine	CHRM3
1058	nuciferine	OPRM1
1059	nuciferine	RXRA
1060	nuciferine	HTR3A
1061	nuciferine	CHRM5
1062	nuciferine	CHRM4
1063	nuciferine	SLC6A3
1064	nuciferine	GABRA1
1065	nuciferine	ADRA1A
1066	nuciferine	OPRD1
1067	nudicauline
1068	orientin	PIM1
1069	orientin	BAX
1070	orientin	CASP3
1071	orientin	BCL2
1072	orientin	CA2
1073	palmitic acid	CTSD
1074	palmitic acid	PTGS1
1075	palmitic acid	PTGS2
1076	palmitic acid	RHO
1077	palmitic acid	NCOA2
1078	palmitic acid	BCL2
1079	palmitic acid	IL10
1080	palmitic acid	TNF
1081	palmitic acid	COL1A1
1082	palmitic acid	PTEN
1083	palmitic acid	GUSBP1
1084	palmitic acid	SLC22A5
1085	palmitic acid	PCYT1A
1086	propanethial s-oxide
1087	quercetin-3-Ｏ-galactoside	PIM1
1088	quercetin-3-Ｏ-galactoside	ESR1
1089	quercetin-3-Ｏ-galactoside	NOS2
1090	quercetin-3-Ｏ-galactoside	GSK3B
1091	quercetin-3-Ｏ-galactoside	CCNA2
1092	quercetin-3-Ｏ-galactoside	NCOA2
1093	quercetin-3-Ｏ-galactoside	ESR2
1094	quercetin-3-Ｏ-galactoside	PTGS1
1095	quercetin-3-Ｏ-galactoside	CDK2
1096	quercetin-3-Ｏ-galactoside	PTGS2
1097	quercetin-3-Ｏ-galactoside	PPARG
1098	quercetin-3-Ｏ-galactoside	MAPK14
1099	quercetin-3-Ｏ-galactoside	AR
1100	quercetin-3-Ｏ-galactoside	CA2
1101	quercetin-3-Ｏ-galactoside	PRSS1
1102	quercetin-3-Ｏ-galactoside	DPEP1
1103	roemerine	PIM1
1104	roemerine	ESR1
1105	roemerine	SCN5A
1106	roemerine	ADRB2
1107	roemerine	ESR2
1108	roemerine	ACHE
1109	roemerine	DPP4
1110	roemerine	PTGS1
1111	roemerine	CDK2
1112	roemerine	CHRNA7
1113	roemerine	PTGS2
1114	roemerine	ADRA1B
1115	roemerine	ADRA1D
1116	roemerine	SLC6A4
1117	roemerine	AR
1118	roemerine	CHRM1
1119	roemerine	CHRM3
1120	roemerine	CHRNA2
1121	roemerine	OPRM1
1122	roemerine	RXRA
1123	roemerine	HTR3A
1124	roemerine	CHRM5
1125	roemerine	GABRA1
1126	roemerine	OPRD1
1127	rolliniastatin 1
1128	roughanic acid	RXRG
1129	roughanic acid	RORB
1130	roughanic acid	RARG
1131	roughanic acid	RARA
1132	roughanic acid	NR1H3
1133	roughanic acid	RXRB
1134	roughanic acid	RORA
1135	roughanic acid	RARB
1136	roughanic acid	BACE1
1137	roughanic acid	RXRA
1138	roughanic acid	PIN1
1139	roughanic acid	ACHE
1140	rutin	GZMB
1141	rutin	IL1B
1142	rutin	TNF
1143	rutin	PLAU
1144	rutin	POR
1145	rutin	NOS2
1146	rutin	TFAM
1147	rutin	FGF2
1148	rutin	CCL2
1149	rutin	NOS1
1150	rutin	JUN
1151	rutin	FGF19
1152	rutin	NCOA2
1153	rutin	CCN2
1154	rutin	ACHE
1155	rutin	HSPA4
1156	rutin	DPP4
1157	rutin	PLAT
1158	rutin	PTGS1
1159	rutin	HGF
1160	rutin	EGFR
1161	rutin	KLK3
1162	rutin	STAT4
1163	rutin	S100A8
1164	rutin	CXCL1
1165	rutin	MPO
1166	rutin	UCP1
1167	rutin	PTGS2
1168	rutin	CYP1A1
1169	rutin	NOS3
1170	rutin	IRS1
1171	rutin	SREBF1
1172	rutin	FGF21
1173	rutin	VEGFA
1174	rutin	PPARGC1A
1175	rutin	CASP7
1176	rutin	CASP3
1177	rutin	IFNG
1178	rutin	SIRT1
1179	rutin	PPARG
1180	rutin	CXCL10
1181	rutin	ADRA2A
1182	rutin	ALDH2
1183	rutin	TMPRSS6
1184	rutin	PRSS48
1185	rutin	FGF3
1186	rutin	KLK5
1187	rutin	TPSD1
1188	rutin	TMPRSS7
1189	rutin	AZU1
1190	rutin	KLK1
1191	rutin	GZMA
1192	rutin	TMPRSS11D
1193	rutin	P4HB
1194	rutin	PRSS21
1195	rutin	KLK13
1196	rutin	TMPRSS11A
1197	rutin	CORIN
1198	rutin	F7
1199	rutin	GZMH
1200	rutin	PRSS40A
1201	rutin	PRSS42P
1202	rutin	CTSG
1203	rutin	F11
1204	rutin	FGF1
1205	rutin	KLK6
1206	rutin	FGF14
1207	rutin	FGF8
1208	rutin	TMPRSS4
1209	rutin	CTRB1
1210	rutin	PRSS58
1211	rutin	FGF4
1212	rutin	TMPRSS9
1213	rutin	F12
1214	rutin	KLK2
1215	rutin	CA2
1216	rutin	PROC
1217	rutin	PRSS8
1218	rutin	TYW1
1219	rutin	PLG
1220	rutin	PRSS36
1221	rutin	PRSS12
1222	rutin	FGF22
1223	rutin	OVCH1
1224	rutin	TMPRSS12
1225	rutin	CMA1
1226	rutin	CTRL
1227	rutin	F2
1228	rutin	PRSS53
1229	rutin	KLKB1
1230	rutin	FGF20
1231	rutin	HABP2
1232	rutin	GZMK
1233	rutin	AKR1C3
1234	rutin	ADRA2C
1235	rutin	PRTN3
1236	rutin	MST1
1237	rutin	CTRB2
1238	rutin	CTRC
1239	rutin	C1RL
1240	rutin	PRSS45P
1241	rutin	KLK12
1242	rutin	PRSS3
1243	rutin	PRSS37
1244	rutin	HPN
1245	rutin	KLK9
1246	rutin	F9
1247	rutin	TMPRSS13
1248	rutin	PRSS50
1249	rutin	CELA2A
1250	rutin	FGF5
1251	rutin	F10
1252	rutin	CHRM5
1253	rutin	MASP1
1254	rutin	LPA
1255	rutin	TMPRSS11F
1256	rutin	KLK15
1257	rutin	KLK11
1258	rutin	PRSS55
1259	rutin	PRSS54
1260	rutin	MTRR
1261	rutin	TPSAB1
1262	rutin	ACR
1263	rutin	KLK14
1264	rutin	TMPRSS11E
1265	rutin	C1S
1266	rutin	PRSS27
1267	rutin	MASP2
1268	rutin	PRSS33
1269	rutin	FGF18
1270	rutin	PRSS1
1271	rutin	PRSS38
1272	rutin	CFB
1273	rutin	NDOR1
1274	rutin	CFI
1275	rutin	CELA3B
1276	rutin	TMPRSS2
1277	rutin	CELA1
1278	rutin	FGF7
1279	rutin	PRNP
1280	rutin	TMPRSS11B
1281	rutin	RHO
1282	rutin	PRSS57
1283	rutin	FGF12
1284	rutin	FGF17
1285	rutin	PRSS22
1286	rutin	ELANE
1287	rutin	HP
1288	rutin	TMPRSS15
1289	rutin	PROZ
1290	rutin	GSR
1291	rutin	KLK4
1292	rutin	CELA3A
1293	rutin	HPR
1294	rutin	PRSS46P
1295	rutin	FGF6
1296	rutin	GZMM
1297	rutin	KLK8
1298	rutin	FGF16
1299	rutin	TMPRSS3
1300	rutin	FGF11
1301	rutin	FGF23
1302	rutin	ST14
1303	rutin	FGF9
1304	rutin	FGF10
1305	rutin	CELA2B
1306	rutin	TMPRSS5
1307	rutin	TPSG1
1308	rutin	HGFAC
1309	rutin	C2
1310	rutin	KLK7
1311	rutin	CFD
1312	rutin	KLK10
1313	rutin	XDH
1314	rutin	PDE5A
1315	rutin	MMP9
1316	rutin	CA2
1317	rutin	AURKB
1318	rutin	PTPN1
1319	rutin	CA7
1320	rutin	CA12
1321	rutin	ACHE
1322	rutin	CA4
1323	rutin	CA1
1324	saffloryellow
1325	sitogluside	KCNH2
1326	sitogluside	NR3C1
1327	sitogluside	PIM1
1328	sitogluside	ESR1
1329	sitogluside	NOS2
1330	sitogluside	GSK3B
1331	sitogluside	SCN5A
1332	sitogluside	CCNA2
1333	sitogluside	NCOA1
1334	sitogluside	NCOA2
1335	sitogluside	CHEK1
1336	sitogluside	ADRB2
1337	sitogluside	ESR2
1338	sitogluside	PGR
1339	sitogluside	ACHE
1340	sitogluside	CALM3
1341	sitogluside	DPP4
1342	sitogluside	PTGS1
1343	sitogluside	CDK2
1344	sitogluside	PTGS2
1345	sitogluside	PPARG
1346	sitogluside	MAPK14
1347	sitogluside	ADRA1B
1348	sitogluside	ADRA1D
1349	sitogluside	NR3C2
1350	sitogluside	AR
1351	sitogluside	PYGM
1352	sitogluside	CHRM1
1353	sitogluside	CA2
1354	sitogluside	CHRM3
1355	sitogluside	PRSS3
1356	sitogluside	RXRA
1357	sitogluside	HTR3A
1358	sitogluside	LYZ
1359	sitogluside	PDE3A
1360	sitogluside	PRSS1
1361	sitogluside	DPEP1
1362	stigmasterol	ABCG8
1363	stigmasterol	ABCG5
1364	stigmasterol	NR1H3
1365	stigmasterol	APP
1366	stigmasterol	BACE1
1367	stigmasterol	ABCB11
1368	stigmasterol	ABCC2
1369	stigmasterol	NR1H4
1370	stigmasterol	NR1H2
1371	stigmasterol	TLR4
1372	stigmasterol	F10
1373	stigmasterol	AR
1374	stigmasterol	SREBF2
1375	stigmasterol	NPC1L1
1376	stigmasterol	GRIN1
1377	stigmasterol	CYP19A1
1378	stigmasterol	BCHE
1379	stigmasterol	SHBG
1380	stigmasterol	ITGB3
1381	stigmasterol	GPBAR1
1382	stigmasterol	CYP17A1
1383	stigmasterol	AR
1384	stigmasterol	TRPV1
1385	stigmasterol	GRIN1
1386	tannins
1387	trans-1,3-phytodiene
1388	vitexin	SLC12A2
1389	vitexin	TJP1
1390	XAT
The target gene list was obtained from TCM databases (TCMBank, ETCM v2.0 and TCMSP) and confirmed using the Uniprot database.
